# Supplementary material for: Unsupervised Machine Learning Unveil Easily Identifiable Subphenotypes of COVID-19 With Differing Disease Trajectories
Source: bioRxiv or medRxiv preprint supplement (doi:10.1101/2023.04.07.23288152), 2023-04-15
Supplement: Supplementary file [file media-1.pdf]

## Supplemental Information

### Supplemental figures

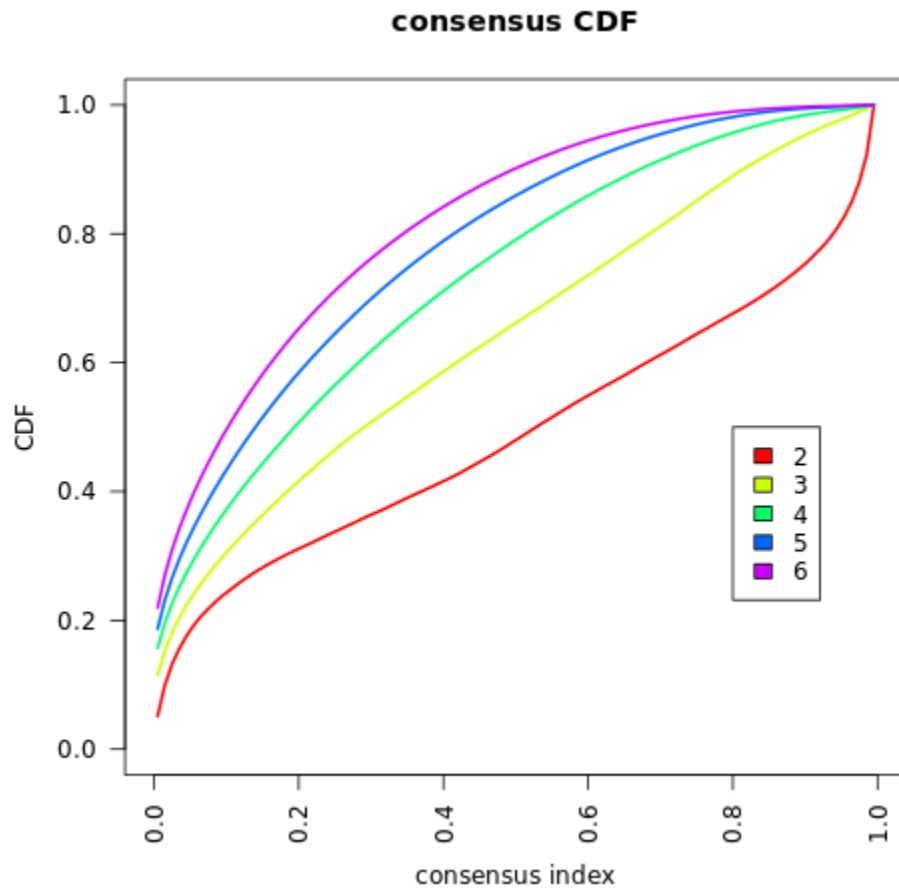

*Supplemental Figure 1: Cumulative Distribution Function plotted against consensus index. The Consensus index represents how often two samples are placed together in the same cluster. A consensus value of one indicates that the two samples are always grouped together while a value of 0 indicates that two samples are never grouped together. Percent of Ambiguous Clusters (PAC) is a measure of how much of the CDF falls between a consensus index between 0.1 and 0.9. The plot above shows that as we increase the number of clusters, it's clear that the PAC will always decrease. Hence choosing the minimal PAC will lead to a cluster size equal to the number of samples.*

## Intermediate vs Hypoinflammatory

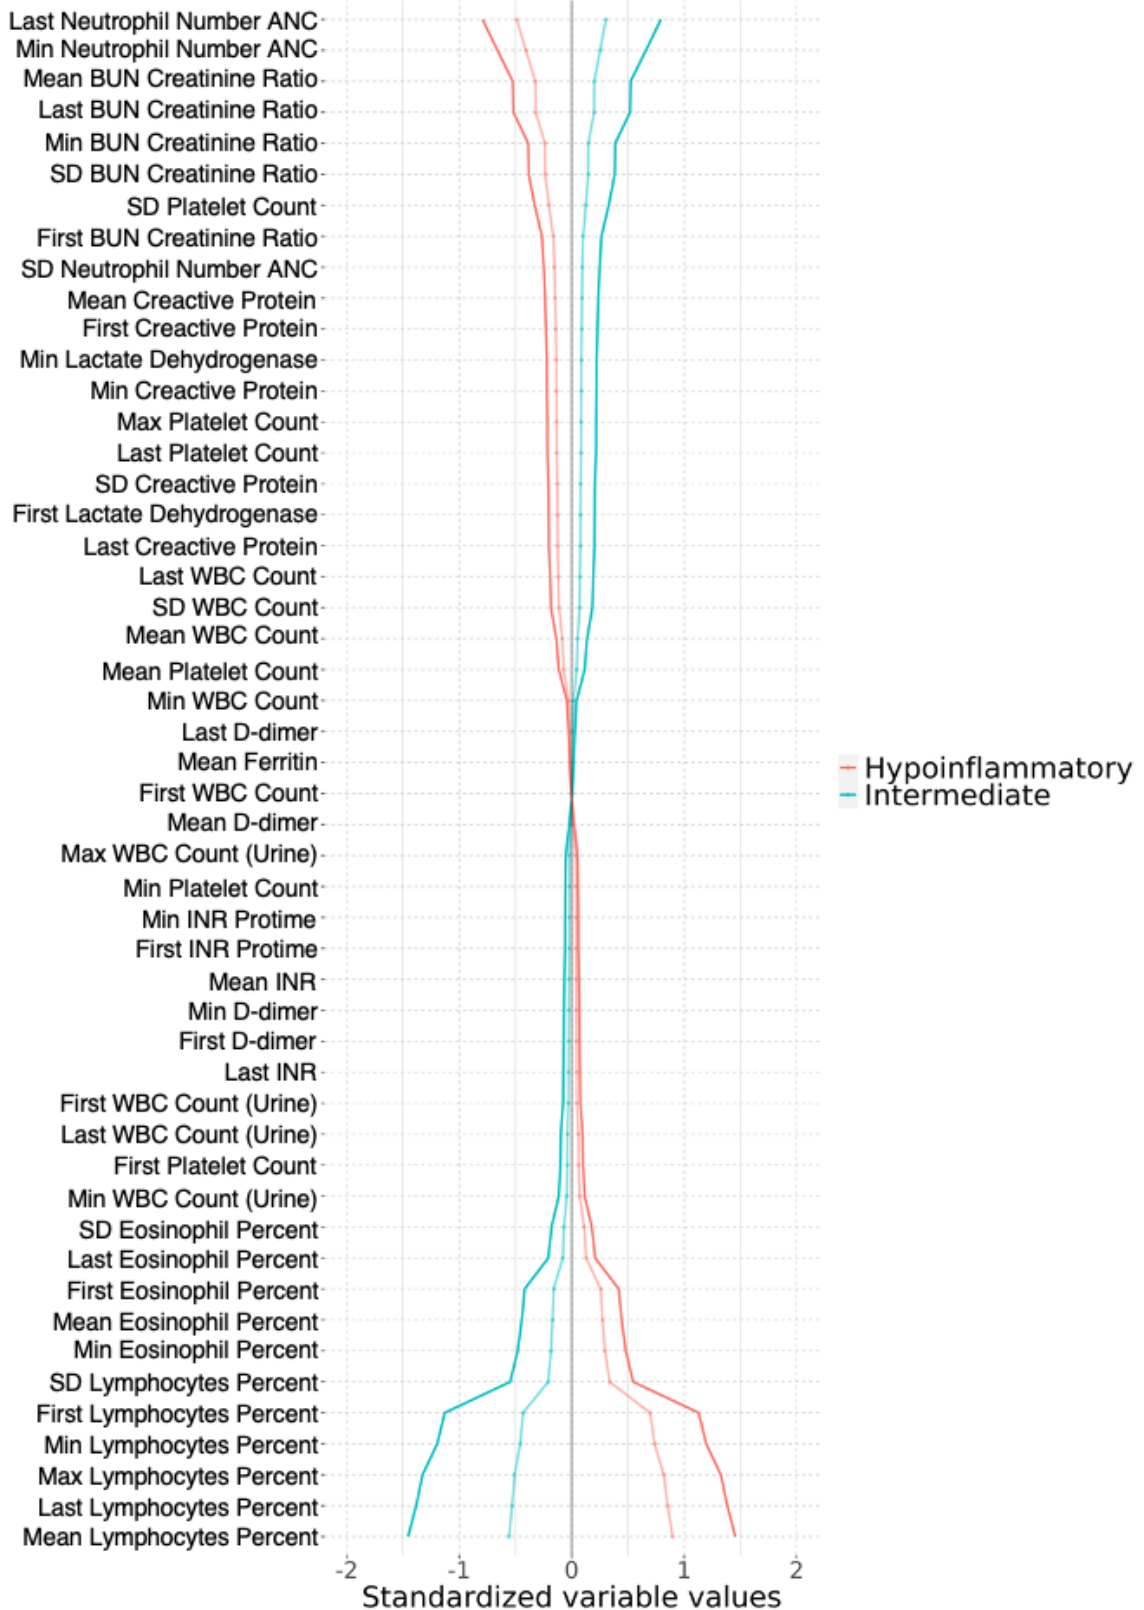

## Intermediate vs Hyperinflammatory

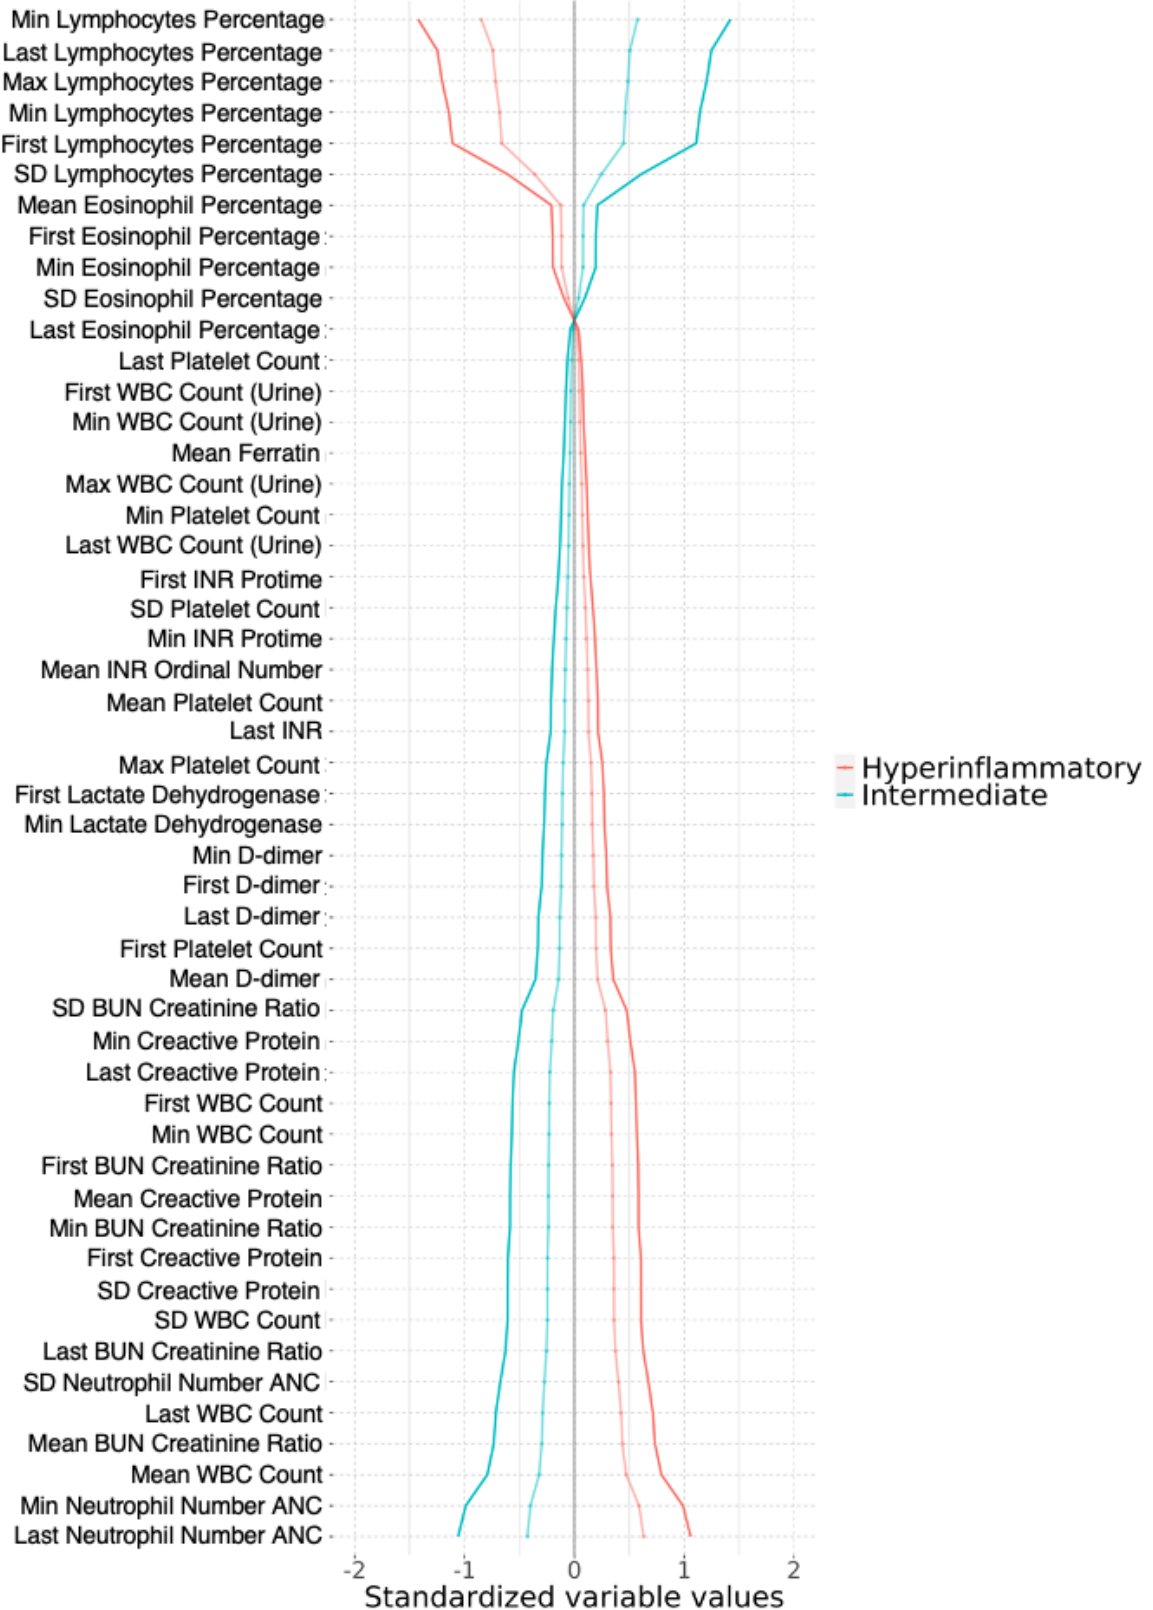

## Supplemental Tables

| Column1                       | Mean                               | Standard Deviation                | First                               | Last                                | Min                                | Max                                |
|-------------------------------|------------------------------------|-----------------------------------|-------------------------------------|-------------------------------------|------------------------------------|------------------------------------|
| CREACTIVE_P<br>E_PROTEIN      | CREACTIVE_P<br>ROTEIN_M<br>ean     | CREACTIVE_P<br>_PROTEIN_<br>sd    | CREACTIVE_P<br>ROTEIN_Fir<br>st     | CREACTIVE_P<br>ROTEIN_La<br>st      | CREACTIVE_P<br>ROTEIN_Mi<br>n      |                                    |
| DDIMER                        | DDIMER_Me<br>an                    |                                   | DDIMER_Fir<br>st                    | DDIMER_Las<br>t                     | DDIMER_Mi<br>n                     |                                    |
| FERRITIN                      | FERRITIN_M<br>ean                  |                                   |                                     |                                     |                                    |                                    |
| LACTATE_DE<br>HYDROGENA<br>SE | LACTATE_DE<br>HYDROGENA<br>SE_Mean |                                   | LACTATE_D<br>EHYDROGE<br>NASE_First |                                     |                                    |                                    |
| LYMPHOCY<br>TES_percen<br>t   | LYMPHOCYT<br>ES_percent_<br>Mean   | LYMPHOCYT<br>ES_percent_<br>t_sd  | LYMPHOCYT<br>ES_percent_<br>First   | LYMPHOCYT<br>ES_percent_<br>Last    | LYMPHOCYT<br>ES_percent_<br>Min    | LYMPHOCYT<br>ES_percent_<br>Max    |
| PLATELET_C<br>OUNT            | PLATELET_C<br>OUNT_Mean            | PLATELET_C<br>OUNT_sd             | PLATELET_C<br>OUNT_First            | PLATELET_C<br>OUNT_Last             | PLATELET_C<br>OUNT_Min             | PLATELET_C<br>OUNT_Max             |
| NEUTROPHIL<br>_NUMBER_        |                                    | NEUTROPHIL<br>_NUMBER_<br>_ANC_sd |                                     | NEUTROPHIL<br>_NUMBER_<br>_ANC_Last | NEUTROPHIL<br>_NUMBER_<br>_ANC_Min | NEUTROPHIL<br>_NUMBER_<br>_ANC_Max |
| EOSINOPHIL<br>_percent        | EOSINOPHIL<br>_percent_M<br>ean    | EOSINOPHIL<br>_percent_<br>sd     | EOSINOPHIL<br>_percent_Fi<br>rst    | EOSINOPHIL<br>_percent_La<br>st     | EOSINOPHIL<br>_percent_M<br>in     |                                    |
| BUN_CREA<br>TININE_RAT<br>IO  | BUN_CREA<br>TININE_RAT<br>IO_Mean  | BUN_CREA<br>TININE_R<br>ATIO_sd   | BUN_CREA<br>TININE_RA<br>TIO_First  | BUN_CREA<br>TININE_RAT<br>IO_Last   | BUN_CREA<br>TININE_RA<br>TIO_Min   |                                    |
| INR_PROTEI<br>ME              |                                    |                                   | INR_PROTEI<br>ME_First              |                                     | INR_PROTEI<br>ME_Min               |                                    |
| WBC_COUNT<br>_URINE           |                                    |                                   | WBC_COUNT<br>_URINE_Fir<br>st       | WBC_COUNT<br>_URINE_La<br>st        | WBC_COUNT<br>_URINE_Mi<br>n        | WBC_COUNT<br>_URINE_M<br>ax        |
| WBC_ord_nu<br>m_value         | WBC_ord_nu<br>m_value_M<br>ean     | WBC_ord_nu<br>m_value_s<br>d      | WBC_ord_nu<br>m_value_F<br>irst     | WBC_ord_nu<br>m_value_L<br>ast      | WBC_ord_nu<br>m_value_<br>Min      |                                    |
| INR_ord_nu<br>m_value         | INR_ord_nu<br>m_value_Me<br>an     |                                   |                                     | INR_ord_nu<br>m_value_La<br>st      |                                    |                                    |

Supplemental Table 1: Describes which features were selected and kept in feature selection

Supplemental Table 2: ICD 10 codes used to explore outcomes

| Condition | ICD-10 Code | Count | Total Count | Unique Total Count |
|-----------|-------------|-------|-------------|--------------------|
| DVT       | I82         | 444   | 444         | 336                |
| PE        | I26         | 287   | 354         | 341                |
|           | T81.7       | 3     |             |                    |
|           | T82.8       | 49    |             |                    |
|           | T79.0       | 2     |             |                    |
|           | T79.1       | 1     |             |                    |
|           | T80.0       | 0     |             |                    |
| MI        | I21         | 442   | 548         | 536                |
|           | I22         | 1     |             |                    |
|           | I23         | 0     |             |                    |
|           | I24         | 97    |             |                    |

|         |     |     |  |  |
|---------|-----|-----|--|--|
| Stroke: | I60 | 18  |  |  |
|         | I61 | 45  |  |  |
|         | I63 | 103 |  |  |
|         | I65 | 33  |  |  |
|         | I66 | 3   |  |  |
|         | G45 | 15  |  |  |

Supplemental Table 3. Race Results

| cluster | first_race | n    |
|---------|------------|------|
| 1       | Am Indian  | 6    |
| 1       | Asian      | 160  |
| 1       | Black      | 1128 |
|         | NotDisclos |      |
| 1       | e          | 1    |
| 1       | Other      | 615  |
|         | Other      |      |
| 1       | Pacifi     | 1    |
|         | Pac        |      |
| 1       | Islander   | 1    |
| 1       | Unknown    | 13   |
| 1       | White      | 1148 |
| 1       | NA         | 3    |
| 2       | Am Indian  | 4    |
| 2       | Asian      | 128  |
| 2       | Black      | 598  |
| 2       | Hispanic   | 1    |
|         | NotDisclos |      |
| 2       | e          | 2    |
| 2       | Other      | 335  |
|         | Other      |      |
| 2       | Pacifi     | 1    |
|         | Pac        |      |
| 2       | Islander   | 2    |
| 2       | Unknown    | 15   |
| 2       | White      | 1004 |
| 3       | Am Indian  | 3    |
| 3       | Asian      | 65   |
| 3       | Black      | 859  |
| 3       | Hispanic   | 1    |
|         | NotDisclos |      |
| 3       | e          | 3    |
| 3       | Other      | 370  |
| 3       | Pac        | 1    |

|   |          |     |
|---|----------|-----|
|   | Islander |     |
| 3 | Unknown  | 7   |
| 3 | White    | 593 |
| 3 | NA       | 8   |

## Supplemental Equation

Standardized Mean Difference

$$SMD = \frac{\overline{X}_1 - \overline{X}_2}{\sqrt{(S_1^2 + S_2^2)/2}}$$

Where  $\overline{X}_1$  and  $\overline{X}_2$  represent the mean of a variable of interest in group 1 and two respectively while  $S_1$  and  $S_2$  represent the variance.
